# Supplementary material for: Infrared spectroscopy based on broadly tunable quantum cascade lasers and polycrystalline diamond waveguides
Source: Royal Society of Chemistry journal article supplement (doi:10.1039/c8an00919h), 2018-01-01
Supplement: c8an00919h1.pdf [file c8an00919h1.pdf]

There is no supplementary information available for this article.
